# Supplementary material
Source: PubMed Central journal article supplement (PMC1266065)
Supplement: nar_33_18_5991__1.pdf [file nar_33_18_5991__1.pdf]

| GridSpotName | Experiment I, average of 4 repeats | Experiment II, average of 4 repeats | Normalization, Experiment I (x1,15) | Normalization, Experiment II (x0,90) | averages values of Experiments I and II | STDV        |
|--------------|------------------------------------|-------------------------------------|-------------------------------------|--------------------------------------|-----------------------------------------|-------------|
| <b>ndhF</b>  | <b>0,43</b>                        | <b>0,40</b>                         | <b>0,49</b>                         | <b>0,36</b>                          | <b>0,43</b>                             | <b>0,10</b> |
| <b>ycf4</b>  | <b>0,51</b>                        | <b>0,64</b>                         | <b>0,59</b>                         | <b>0,57</b>                          | <b>0,58</b>                             | <b>0,01</b> |
| <b>ndhG</b>  | <b>0,69</b>                        | <b>0,61</b>                         | <b>0,79</b>                         | <b>0,55</b>                          | <b>0,67</b>                             | <b>0,17</b> |
| petA         | 0,59                               | 0,75                                | 0,68                                | 0,68                                 | 0,68                                    | 0,00        |
| psbB         | 0,48                               | 0,92                                | 0,55                                | 0,83                                 | 0,69                                    | 0,19        |
| rps16        | 0,63                               | 0,73                                | 0,72                                | 0,65                                 | 0,69                                    | 0,05        |
| ndhI         | 0,61                               | 0,82                                | 0,70                                | 0,74                                 | 0,72                                    | 0,02        |
| clpP         | 0,57                               | 0,89                                | 0,66                                | 0,80                                 | 0,73                                    | 0,10        |
| psbD         | 0,53                               | 0,95                                | 0,61                                | 0,85                                 | 0,73                                    | 0,17        |
| ycf1         | 0,66                               | 0,79                                | 0,76                                | 0,71                                 | 0,73                                    | 0,04        |
| rpoB         | 0,55                               | 0,95                                | 0,63                                | 0,86                                 | 0,74                                    | 0,16        |
| cemA (ycf10) | 0,68                               | 0,83                                | 0,78                                | 0,75                                 | 0,77                                    | 0,02        |
| ndhD         | 0,68                               | 0,87                                | 0,78                                | 0,79                                 | 0,78                                    | 0,00        |
| rpoA         | 0,62                               | 0,97                                | 0,71                                | 0,87                                 | 0,79                                    | 0,11        |
| psbJ         | 0,63                               | 0,96                                | 0,72                                | 0,86                                 | 0,79                                    | 0,10        |
| rbcL         | 0,61                               | 1,02                                | 0,70                                | 0,91                                 | 0,81                                    | 0,15        |
| petD         | 0,58                               | 1,07                                | 0,67                                | 0,96                                 | 0,81                                    | 0,21        |
| ndhA         | 0,68                               | 0,94                                | 0,78                                | 0,84                                 | 0,81                                    | 0,04        |
| rps8         | 0,81                               | 0,81                                | 0,93                                | 0,72                                 | 0,83                                    | 0,15        |
| psbI         | 0,8                                | 0,82                                | 0,92                                | 0,74                                 | 0,83                                    | 0,13        |
| ndhC         | 0,6                                | 1,10                                | 0,69                                | 0,99                                 | 0,84                                    | 0,21        |
| ndhH         | 0,73                               | 0,95                                | 0,84                                | 0,85                                 | 0,85                                    | 0,01        |
| ycf2         | 0,73                               | 1,00                                | 0,84                                | 0,90                                 | 0,87                                    | 0,04        |
| petB         | 0,58                               | 1,19                                | 0,67                                | 1,07                                 | 0,87                                    | 0,29        |
| rpoC2        | 0,7                                | 1,08                                | 0,81                                | 0,97                                 | 0,89                                    | 0,11        |
| 5'rps12      | 0,97                               | 0,75                                | 1,12                                | 0,67                                 | 0,89                                    | 0,31        |
| accD         | 0,77                               | 1,02                                | 0,89                                | 0,92                                 | 0,90                                    | 0,02        |
| psbC         | 0,63                               | 1,21                                | 0,72                                | 1,08                                 | 0,90                                    | 0,25        |
| psbL         | 0,56                               | 1,31                                | 0,64                                | 1,18                                 | 0,91                                    | 0,38        |
| ndhE         | 0,72                               | 1,12                                | 0,83                                | 1,01                                 | 0,92                                    | 0,13        |
| psaA         | 0,81                               | 1,03                                | 0,93                                | 0,93                                 | 0,93                                    | 0,00        |
| atpI         | 0,81                               | 1,06                                | 0,93                                | 0,95                                 | 0,94                                    | 0,01        |
| psaI         | 0,58                               | 1,36                                | 0,67                                | 1,22                                 | 0,95                                    | 0,39        |
| rpoC1        | 0,68                               | 1,25                                | 0,78                                | 1,12                                 | 0,95                                    | 0,24        |
| rpl2         | 0,79                               | 1,11                                | 0,91                                | 1,00                                 | 0,95                                    | 0,06        |
| ndhK         | 0,79                               | 1,11                                | 0,91                                | 1,00                                 | 0,95                                    | 0,07        |
| rps19        | 0,88                               | 1,01                                | 1,01                                | 0,91                                 | 0,96                                    | 0,07        |
| psbT (ycf8)  | 0,93                               | 0,95                                | 1,07                                | 0,86                                 | 0,96                                    | 0,15        |
| rps7         | 0,79                               | 1,15                                | 0,91                                | 1,04                                 | 0,97                                    | 0,09        |
| rps11        | 0,66                               | 1,33                                | 0,76                                | 1,19                                 | 0,98                                    | 0,31        |
| ccsA(ycf5)   | 0,78                               | 1,18                                | 0,90                                | 1,06                                 | 0,98                                    | 0,11        |
| psbA         | 1,08                               | 0,79                                | 1,24                                | 0,71                                 | 0,98                                    | 0,37        |
| ndhB         | 0,85                               | 1,10                                | 0,98                                | 0,99                                 | 0,98                                    | 0,01        |
| ycf3         | 0,77                               | 1,21                                | 0,89                                | 1,08                                 | 0,99                                    | 0,14        |
| 3'rps12      | 0,95                               | 1,02                                | 1,09                                | 0,92                                 | 1,00                                    | 0,12        |
| psbH         | 0,83                               | 1,19                                | 0,95                                | 1,07                                 | 1,01                                    | 0,08        |
| petL (ycf7)  | 0,87                               | 1,14                                | 1,00                                | 1,03                                 | 1,01                                    | 0,02        |
| ycf15        | 0,78                               | 1,27                                | 0,90                                | 1,14                                 | 1,02                                    | 0,17        |

|                        |             |             |             |             |             |      |
|------------------------|-------------|-------------|-------------|-------------|-------------|------|
| psbN                   | 0,88        | 1,16        | 1,01        | 1,04        | 1,03        | 0,02 |
| rps4                   | 0,64        | 1,48        | 0,74        | 1,33        | 1,03        | 0,42 |
| rpl20                  | 0,79        | 1,29        | 0,91        | 1,16        | 1,03        | 0,18 |
| ndhJ                   | 0,83        | 1,27        | 0,95        | 1,14        | 1,05        | 0,13 |
| atpH                   | 1,12        | 0,95        | 1,29        | 0,86        | 1,07        | 0,31 |
| psaB                   | 1,14        | 0,98        | 1,31        | 0,88        | 1,10        | 0,30 |
| psbF                   | 1,14        | 1,00        | 1,31        | 0,90        | 1,10        | 0,29 |
| atpB                   | 0,85        | 1,37        | 0,98        | 1,24        | 1,11        | 0,18 |
| rpl14                  | 0,95        | 1,25        | 1,09        | 1,13        | 1,11        | 0,02 |
| atpA                   | 1,07        | 1,12        | 1,23        | 1,01        | 1,12        | 0,16 |
| rps15                  | 1,29        | 0,87        | 1,48        | 0,79        | 1,13        | 0,49 |
| psbE                   | 1,12        | 1,11        | 1,29        | 0,99        | 1,14        | 0,21 |
| matK                   | 0,83        | 1,53        | 0,95        | 1,38        | 1,17        | 0,30 |
| rpl16                  | 1,04        | 1,28        | 1,20        | 1,15        | 1,18        | 0,03 |
| rpl33                  | 1,01        | 1,36        | 1,16        | 1,22        | 1,19        | 0,04 |
| rps2                   | 0,85        | 1,57        | 0,98        | 1,42        | 1,20        | 0,31 |
| rpl22                  | 1,12        | 1,24        | 1,29        | 1,12        | 1,20        | 0,12 |
| atpF                   | 1,22        | 1,12        | 1,40        | 1,01        | 1,21        | 0,28 |
| psbK                   | 0,94        | 1,51        | 1,08        | 1,36        | 1,22        | 0,19 |
| rps14                  | 1,3         | 1,05        | 1,50        | 0,95        | 1,22        | 0,39 |
| petG                   | 0,96        | 1,52        | 1,10        | 1,37        | 1,23        | 0,19 |
| psbZ (ycf9)            | 1,08        | 1,37        | 1,24        | 1,24        | 1,24        | 0,00 |
| atpE                   | 1,13        | 1,33        | 1,30        | 1,19        | 1,25        | 0,07 |
| rps3                   | 1,1         | 1,38        | 1,27        | 1,24        | 1,25        | 0,02 |
| rps18                  | 0,97        | 1,56        | 1,12        | 1,40        | 1,26        | 0,20 |
| psbM                   | 1,46        | 0,94        | 1,68        | 0,84        | 1,26        | 0,59 |
| psaC                   | 1,24        | 1,33        | 1,43        | 1,20        | 1,31        | 0,16 |
| rpl23                  | 1,38        | 1,24        | 1,59        | 1,12        | 1,35        | 0,33 |
| petN (ycf6)            | 1,16        | 1,68        | 1,33        | 1,51        | 1,42        | 0,13 |
| rpl32                  | 1,36        | 1,64        | 1,56        | 1,48        | 1,52        | 0,06 |
| rpl36                  | 1,72        | 1,22        | 1,98        | 1,10        | 1,54        | 0,62 |
| psaJ                   | 1,82        | 1,74        | 2,09        | 1,57        | 1,83        | 0,37 |
|                        |             |             |             |             |             |      |
| <b>ratio's average</b> | <b>0,87</b> | <b>1,11</b> | <b>1,00</b> | <b>1,00</b> | <b>1,00</b> |      |

## Experiment I

| GridSpotName | Cy3 (WT Col) | Cy5(sig4) | Cy5/Cy3 Ratio | Q-Standardized Expression Ratio | Average of Ratio | STDV |
|--------------|--------------|-----------|---------------|---------------------------------|------------------|------|
| 3'rps12      | 77911        | 121081    | 1,55          | 1,29                            |                  |      |
| 3'rps12      | 113376       | 138186    | 1,22          | 1,01                            |                  |      |
| 3'rps12      | 136755       | 125184    | 0,92          | 0,76                            |                  |      |
| 3'rps12      | 74042        | 63803     | 0,86          | 0,72                            | 0,95             | 0,27 |
| 5'rps12      | 117308       | 185951    | 1,59          | 1,32                            |                  |      |
| 5'rps12      | 147529       | 231626    | 1,57          | 1,31                            |                  |      |
| 5'rps12      | 234677       | 179116    | 0,76          | 0,63                            |                  |      |
| 5'rps12      | 164038       | 125058    | 0,76          | 0,63                            | 0,97             | 0,39 |
| accD         | 217524       | 234222    | 1,08          | 0,90                            |                  |      |
| accD         | 411070       | 391856    | 0,95          | 0,79                            |                  |      |
| accD         | 304551       | 257910    | 0,85          | 0,70                            |                  |      |
| accD         | 324308       | 263542    | 0,81          | 0,68                            | 0,77             | 0,10 |
| atpA         | 829288       | 1186342   | 1,43          | 1,19                            |                  |      |
| atpA         | 624174       | 787676    | 1,26          | 1,05                            |                  |      |
| atpA         | 494306       | 613496    | 1,24          | 1,03                            |                  |      |
| atpA         | 826694       | 994344    | 1,20          | 1,00                            | 1,07             | 0,08 |
| atpB         | 279288       | 334560    | 1,20          | 1,00                            |                  |      |
| atpB         | 322755       | 327372    | 1,01          | 0,84                            |                  |      |
| atpB         | 409690       | 398536    | 0,97          | 0,81                            |                  |      |
| atpB         | 426599       | 383045    | 0,90          | 0,75                            | 0,85             | 0,11 |
| atpE         | 427588       | 675756    | 1,58          | 1,31                            |                  |      |
| atpE         | 401538       | 582934    | 1,45          | 1,21                            |                  |      |
| atpE         | 948888       | 1141072   | 1,20          | 1,00                            |                  |      |
| atpE         | 455947       | 544600    | 1,19          | 0,99                            | 1,13             | 0,16 |
| atpF         | 804626       | 1304338   | 1,62          | 1,35                            |                  |      |
| atpF         | 610053       | 946282    | 1,55          | 1,29                            |                  |      |
| atpF         | 730944       | 1034286   | 1,42          | 1,18                            |                  |      |
| atpF         | 1289738      | 1653612   | 1,28          | 1,07                            | 1,22             | 0,12 |
| atpH         | 1169098      | 1732402   | 1,48          | 1,23                            |                  |      |
| atpH         | 1451398      | 1945637   | 1,34          | 1,12                            |                  |      |
| atpH         | 1860816      | 2420440   | 1,30          | 1,08                            |                  |      |
| atpH         | 1339910      | 1692252   | 1,26          | 1,05                            | 1,12             | 0,08 |
| atpI         | 262822       | 291636    | 1,11          | 0,92                            |                  |      |
| atpI         | 317202       | 330579    | 1,04          | 0,87                            |                  |      |
| atpI         | 268009       | 259938    | 0,97          | 0,81                            |                  |      |
| atpI         | 409851       | 326514    | 0,80          | 0,66                            | 0,81             | 0,11 |
| ccsA(ycf5)   | 89762        | 102580    | 1,14          | 0,95                            |                  |      |
| ccsA(ycf5)   | 72606        | 71692     | 0,99          | 0,82                            |                  |      |
| ccsA(ycf5)   | 87396        | 81874     | 0,94          | 0,78                            |                  |      |
| ccsA(ycf5)   | 85356        | 58121     | 0,68          | 0,57                            | 0,78             | 0,16 |
| cemA (ycf10) | 130274       | 173883    | 1,33          | 1,11                            |                  |      |
| cemA (ycf10) | 201092       | 164471    | 0,82          | 0,68                            |                  |      |

|              |        |        |      |      |      |      |
|--------------|--------|--------|------|------|------|------|
| cemA (ycf10) | 134367 | 94834  | 0,71 | 0,59 |      |      |
| cemA (ycf10) | 290628 | 113459 | 0,39 | 0,32 | 0,68 | 0,33 |
| clpP         | 70646  | 68972  | 0,98 | 0,81 |      |      |
| clpP         | 159130 | 113222 | 0,71 | 0,59 |      |      |
| clpP         | 127427 | 78872  | 0,62 | 0,51 |      |      |
| clpP         | 163936 | 68016  | 0,41 | 0,35 | 0,57 | 0,19 |
| matK         | 307416 | 365435 | 1,19 | 0,99 |      |      |
| matK         | 450066 | 519580 | 1,15 | 0,96 |      |      |
| matK         | 422109 | 359344 | 0,85 | 0,71 |      |      |
| matK         | 398887 | 325406 | 0,82 | 0,68 | 0,83 | 0,16 |
| ndhA         | 178826 | 180167 | 1,01 | 0,84 |      |      |
| ndhA         | 127481 | 113500 | 0,89 | 0,74 |      |      |
| ndhA         | 121310 | 83578  | 0,69 | 0,57 |      |      |
| ndhA         | 195808 | 133722 | 0,68 | 0,57 | 0,68 | 0,13 |
| ndhB         | 202538 | 258046 | 1,27 | 1,06 |      |      |
| ndhB         | 192192 | 219513 | 1,14 | 0,95 |      |      |
| ndhB         | 375822 | 366660 | 0,98 | 0,81 |      |      |
| ndhB         | 228700 | 153825 | 0,67 | 0,56 | 0,85 | 0,22 |
| ndhC         | 139048 | 141928 | 1,02 | 0,85 |      |      |
| ndhC         | 453869 | 297907 | 0,66 | 0,55 |      |      |
| ndhC         | 222366 | 145670 | 0,66 | 0,54 |      |      |
| ndhC         | 393316 | 216886 | 0,55 | 0,46 | 0,60 | 0,17 |
| ndhD         | 190043 | 184196 | 0,97 | 0,81 |      |      |
| ndhD         | 177377 | 155619 | 0,88 | 0,73 |      |      |
| ndhD         | 122326 | 96088  | 0,79 | 0,65 |      |      |
| ndhD         | 356602 | 220978 | 0,62 | 0,52 | 0,68 | 0,12 |
| ndhE         | 126328 | 154738 | 1,22 | 1,02 |      |      |
| ndhE         | 233034 | 268282 | 1,15 | 0,96 |      |      |
| ndhE         | 151056 | 90822  | 0,60 | 0,50 |      |      |
| ndhE         | 253794 | 120256 | 0,47 | 0,39 | 0,72 | 0,32 |
| ndhF         | 124114 | 76834  | 0,62 | 0,51 |      |      |
| ndhF         | 197488 | 120240 | 0,61 | 0,51 |      |      |
| ndhF         | 201010 | 98952  | 0,49 | 0,41 |      |      |
| ndhF         | 158920 | 58633  | 0,37 | 0,31 | 0,43 | 0,10 |
| ndhG         | 132822 | 160404 | 1,21 | 1,00 |      |      |
| ndhG         | 205982 | 199672 | 0,97 | 0,81 |      |      |
| ndhG         | 371376 | 247830 | 0,67 | 0,56 |      |      |
| ndhG         | 327981 | 157926 | 0,48 | 0,40 | 0,69 | 0,27 |
| ndhH         | 92286  | 111394 | 1,21 | 1,00 |      |      |
| ndhH         | 113374 | 114735 | 1,01 | 0,84 |      |      |
| ndhH         | 103675 | 73368  | 0,71 | 0,59 |      |      |
| ndhH         | 154331 | 91608  | 0,59 | 0,49 | 0,73 | 0,23 |
| ndhI         | 86962  | 100604 | 1,16 | 0,96 |      |      |
| ndhI         | 101758 | 83048  | 0,82 | 0,68 |      |      |
| ndhI         | 105218 | 51026  | 0,48 | 0,40 |      |      |
| ndhI         | 108966 | 50188  | 0,46 | 0,38 | 0,61 | 0,27 |
| ndhJ         | 214162 | 268385 | 1,25 | 1,04 |      |      |

|             |        |        |      |      |      |      |
|-------------|--------|--------|------|------|------|------|
| ndhJ        | 265588 | 266930 | 1,01 | 0,84 |      |      |
| ndhJ        | 308199 | 269507 | 0,87 | 0,73 |      |      |
| ndhJ        | 423522 | 355913 | 0,84 | 0,70 | 0,83 | 0,16 |
| ndhK        | 283870 | 336974 | 1,19 | 0,99 |      |      |
| ndhK        | 282328 | 282908 | 1,00 | 0,83 |      |      |
| ndhK        | 368300 | 343766 | 0,93 | 0,78 |      |      |
| ndhK        | 537610 | 358054 | 0,67 | 0,55 | 0,79 | 0,18 |
| petA        | 104708 | 112196 | 1,07 | 0,89 |      |      |
| petA        | 198168 | 164434 | 0,83 | 0,69 |      |      |
| petA        | 167526 | 80452  | 0,48 | 0,40 |      |      |
| petA        | 179774 | 84524  | 0,47 | 0,39 | 0,59 | 0,24 |
| petB        | 205236 | 186630 | 0,91 | 0,76 |      |      |
| petB        | 199467 | 144686 | 0,73 | 0,60 |      |      |
| petB        | 194067 | 111485 | 0,57 | 0,48 |      |      |
| petB        | 174157 | 97567  | 0,56 | 0,47 | 0,58 | 0,14 |
| petD        | 158214 | 180542 | 1,14 | 0,95 |      |      |
| petD        | 167723 | 135021 | 0,81 | 0,67 |      |      |
| petD        | 118812 | 51764  | 0,44 | 0,36 |      |      |
| petD        | 245930 | 103255 | 0,42 | 0,35 | 0,58 | 0,29 |
| petG        | 122808 | 169034 | 1,38 | 1,14 |      |      |
| petG        | 160170 | 206234 | 1,29 | 1,07 |      |      |
| petG        | 211766 | 205446 | 0,97 | 0,81 |      |      |
| petG        | 199152 | 191718 | 0,96 | 0,80 | 0,96 | 0,18 |
| petL (ycf7) | 113731 | 186798 | 1,64 | 1,37 |      |      |
| petL (ycf7) | 185510 | 181788 | 0,98 | 0,82 |      |      |
| petL (ycf7) | 254101 | 218956 | 0,86 | 0,72 |      |      |
| petL (ycf7) | 110746 | 78470  | 0,71 | 0,59 | 0,87 | 0,34 |
| petN (ycf6) | 150332 | 294692 | 1,96 | 1,63 |      |      |
| petN (ycf6) | 241180 | 313834 | 1,30 | 1,08 |      |      |
| petN (ycf6) | 224786 | 258316 | 1,15 | 0,96 |      |      |
| petN (ycf6) | 242331 | 278304 | 1,15 | 0,96 | 1,16 | 0,32 |
| psaA        | 289328 | 341114 | 1,18 | 0,98 |      |      |
| psaA        | 364229 | 366592 | 1,01 | 0,84 |      |      |
| psaA        | 523884 | 465002 | 0,89 | 0,74 |      |      |
| psaA        | 328668 | 271384 | 0,83 | 0,69 | 0,81 | 0,13 |
| psaB        | 518450 | 763674 | 1,47 | 1,23 |      |      |
| psaB        | 560723 | 808500 | 1,44 | 1,20 |      |      |
| psaB        | 637603 | 847421 | 1,33 | 1,11 |      |      |
| psaB        | 687998 | 840920 | 1,22 | 1,02 | 1,14 | 0,10 |
| psaC        | 155422 | 299308 | 1,93 | 1,60 |      |      |
| psaC        | 257370 | 441482 | 1,72 | 1,43 |      |      |
| psaC        | 364539 | 575128 | 1,58 | 1,31 |      |      |
| psaC        | 190442 | 142692 | 0,75 | 0,62 | 1,24 | 0,43 |
| psal        | 106324 | 110817 | 1,04 | 0,87 |      |      |
| psal        | 109844 | 96154  | 0,88 | 0,73 |      |      |
| psal        | 124556 | 55712  | 0,45 | 0,37 |      |      |
| psal        | 112433 | 49674  | 0,44 | 0,37 | 0,58 | 0,25 |

|      |         |         |      |      |      |      |
|------|---------|---------|------|------|------|------|
| psaJ | 544962  | 1260802 | 2,31 | 1,92 |      |      |
| psaJ | 547210  | 1243703 | 2,27 | 1,89 |      |      |
| psaJ | 714984  | 1604691 | 2,24 | 1,87 |      |      |
| psaJ | 578748  | 1109037 | 1,92 | 1,59 | 1,82 | 0,15 |
| psbA | 1661399 | 2208893 | 1,33 | 1,11 |      |      |
| psbA | 1349101 | 1793245 | 1,33 | 1,11 |      |      |
| psbA | 1297694 | 1639104 | 1,26 | 1,05 |      |      |
| psbA | 1751427 | 2189416 | 1,25 | 1,04 | 1,08 | 0,04 |
| psbB | 328096  | 231466  | 0,71 | 0,59 |      |      |
| psbB | 283608  | 163156  | 0,58 | 0,48 |      |      |
| psbB | 192076  | 109832  | 0,57 | 0,48 |      |      |
| psbB | 218760  | 101036  | 0,46 | 0,38 | 0,48 | 0,08 |
| psbC | 139790  | 129771  | 0,93 | 0,77 |      |      |
| psbC | 106272  | 87000   | 0,82 | 0,68 |      |      |
| psbC | 218386  | 163324  | 0,75 | 0,62 |      |      |
| psbC | 287684  | 150400  | 0,52 | 0,43 | 0,63 | 0,14 |
| psbD | 293686  | 235296  | 0,80 | 0,67 |      |      |
| psbD | 325140  | 218563  | 0,67 | 0,56 |      |      |
| psbD | 529200  | 312974  | 0,59 | 0,49 |      |      |
| psbD | 282178  | 140273  | 0,50 | 0,41 | 0,53 | 0,11 |
| psbE | 1388740 | 2053467 | 1,48 | 1,23 |      |      |
| psbE | 934510  | 1268320 | 1,36 | 1,13 |      |      |
| psbE | 1441354 | 1844957 | 1,28 | 1,06 |      |      |
| psbE | 1083616 | 1351283 | 1,25 | 1,04 | 1,12 | 0,09 |
| psbF | 1077035 | 1666894 | 1,55 | 1,29 |      |      |
| psbF | 1638807 | 2273247 | 1,39 | 1,15 |      |      |
| psbF | 1952285 | 2591091 | 1,33 | 1,10 |      |      |
| psbF | 1464215 | 1801332 | 1,23 | 1,02 | 1,14 | 0,11 |
| psbH | 117601  | 156630  | 1,33 | 1,11 |      |      |
| psbH | 154470  | 187465  | 1,21 | 1,01 |      |      |
| psbH | 146915  | 109190  | 0,74 | 0,62 |      |      |
| psbH | 224374  | 157430  | 0,70 | 0,58 | 0,83 | 0,27 |
| psbl | 150917  | 199116  | 1,32 | 1,10 |      |      |
| psbl | 181464  | 165750  | 0,91 | 0,76 |      |      |
| psbl | 271586  | 243593  | 0,90 | 0,75 |      |      |
| psbl | 245338  | 172676  | 0,70 | 0,59 | 0,80 | 0,22 |
| psbJ | 230906  | 194965  | 0,84 | 0,70 |      |      |
| psbJ | 561389  | 445958  | 0,79 | 0,66 |      |      |
| psbJ | 549668  | 420512  | 0,77 | 0,64 |      |      |
| psbJ | 474934  | 296608  | 0,62 | 0,52 | 0,63 | 0,08 |
| psbK | 476050  | 610784  | 1,28 | 1,07 |      |      |
| psbK | 471684  | 571926  | 1,21 | 1,01 |      |      |
| psbK | 452029  | 480850  | 1,06 | 0,88 |      |      |
| psbK | 448659  | 421142  | 0,94 | 0,78 | 0,94 | 0,13 |
| psbL | 171502  | 162458  | 0,95 | 0,79 |      |      |
| psbL | 199746  | 146921  | 0,74 | 0,61 |      |      |
| psbL | 194967  | 124832  | 0,64 | 0,53 |      |      |

|             |         |         |      |      |      |      |
|-------------|---------|---------|------|------|------|------|
| psbL        | 214768  | 83218   | 0,39 | 0,32 | 0,56 | 0,19 |
| psbM        | 765797  | 1467876 | 1,92 | 1,59 |      |      |
| psbM        | 448156  | 821156  | 1,83 | 1,52 |      |      |
| psbM        | 662590  | 1176868 | 1,78 | 1,48 |      |      |
| psbM        | 343212  | 514618  | 1,50 | 1,25 | 1,46 | 0,15 |
| psbN        | 1020840 | 1154345 | 1,13 | 0,94 |      |      |
| psbN        | 1404628 | 1486865 | 1,06 | 0,88 |      |      |
| psbN        | 1296898 | 1344005 | 1,04 | 0,86 |      |      |
| psbN        | 1482660 | 1488952 | 1,00 | 0,84 | 0,88 | 0,04 |
| psbT (ycf8) | 1948873 | 2265570 | 1,16 | 0,97 |      |      |
| psbT (ycf8) | 1754719 | 2002117 | 1,14 | 0,95 |      |      |
| psbT (ycf8) | 1538533 | 1696271 | 1,10 | 0,92 |      |      |
| psbT (ycf8) | 1831113 | 1965284 | 1,07 | 0,89 | 0,93 | 0,03 |
| psbZ (ycf9) | 155596  | 242895  | 1,56 | 1,30 |      |      |
| psbZ (ycf9) | 226710  | 334432  | 1,48 | 1,23 |      |      |
| psbZ (ycf9) | 108852  | 134294  | 1,23 | 1,03 |      |      |
| psbZ (ycf9) | 138360  | 129341  | 0,93 | 0,78 | 1,08 | 0,23 |
| rbcL        | 192164  | 162337  | 0,84 | 0,70 |      |      |
| rbcL        | 207960  | 168952  | 0,81 | 0,68 |      |      |
| rbcL        | 243930  | 157622  | 0,65 | 0,54 |      |      |
| rbcL        | 279922  | 179764  | 0,64 | 0,53 | 0,61 | 0,09 |
| rpl14       | 204798  | 271086  | 1,32 | 1,10 |      |      |
| rpl14       | 176800  | 212015  | 1,20 | 1,00 |      |      |
| rpl14       | 100037  | 111566  | 1,12 | 0,93 |      |      |
| rpl14       | 205447  | 195730  | 0,95 | 0,79 | 0,95 | 0,13 |
| rpl16       | 96942   | 188310  | 1,94 | 1,62 |      |      |
| rpl16       | 175838  | 219665  | 1,25 | 1,04 |      |      |
| rpl16       | 167994  | 168426  | 1,00 | 0,83 |      |      |
| rpl16       | 241874  | 197628  | 0,82 | 0,68 | 1,04 | 0,41 |
| rpl2        | 78750   | 92812   | 1,18 | 0,98 |      |      |
| rpl2        | 141314  | 166262  | 1,18 | 0,98 |      |      |
| rpl2        | 151028  | 137576  | 0,91 | 0,76 |      |      |
| rpl2        | 83430   | 43340   | 0,52 | 0,43 | 0,79 | 0,26 |
| rpl20       | 158675  | 188341  | 1,19 | 0,99 |      |      |
| rpl20       | 147146  | 145712  | 0,99 | 0,82 |      |      |
| rpl20       | 159552  | 144260  | 0,90 | 0,75 |      |      |
| rpl20       | 173881  | 128766  | 0,74 | 0,62 | 0,79 | 0,15 |
| rpl22       | 130848  | 224766  | 1,72 | 1,43 |      |      |
| rpl22       | 117980  | 176052  | 1,49 | 1,24 |      |      |
| rpl22       | 143524  | 159650  | 1,11 | 0,93 |      |      |
| rpl22       | 147751  | 156840  | 1,06 | 0,88 | 1,12 | 0,26 |
| rpl23       | 98698   | 182354  | 1,85 | 1,54 |      |      |
| rpl23       | 164624  | 273814  | 1,66 | 1,38 |      |      |
| rpl23       | 111812  | 174271  | 1,56 | 1,30 |      |      |
| rpl23       | 110162  | 170726  | 1,55 | 1,29 | 1,38 | 0,12 |
| rpl32       | 108000  | 258382  | 2,39 | 1,99 |      |      |
| rpl32       | 186137  | 294201  | 1,58 | 1,31 |      |      |

|       |        |         |      |      |      |      |
|-------|--------|---------|------|------|------|------|
| rpl32 | 178654 | 240544  | 1,35 | 1,12 |      |      |
| rpl32 | 260888 | 318223  | 1,22 | 1,01 | 1,36 | 0,44 |
| rpl33 | 394375 | 593571  | 1,51 | 1,25 |      |      |
| rpl33 | 393061 | 461796  | 1,17 | 0,98 |      |      |
| rpl33 | 442374 | 503148  | 1,14 | 0,95 |      |      |
| rpl33 | 450826 | 468762  | 1,04 | 0,86 | 1,01 | 0,17 |
| rpl36 | 881937 | 1868255 | 2,12 | 1,76 |      |      |
| rpl36 | 702378 | 1480165 | 2,11 | 1,75 |      |      |
| rpl36 | 689698 | 1402732 | 2,03 | 1,69 |      |      |
| rpl36 | 658808 | 1319947 | 2,00 | 1,67 | 1,72 | 0,05 |
| rpoA  | 663544 | 571946  | 0,86 | 0,72 |      |      |
| rpoA  | 408276 | 346682  | 0,85 | 0,71 |      |      |
| rpoA  | 315817 | 243086  | 0,77 | 0,64 |      |      |
| rpoA  | 465624 | 224443  | 0,48 | 0,40 | 0,62 | 0,15 |
| rpoB  | 122994 | 120141  | 0,98 | 0,81 |      |      |
| rpoB  | 202592 | 146086  | 0,72 | 0,60 |      |      |
| rpoB  | 120957 | 71792   | 0,59 | 0,49 |      |      |
| rpoB  | 270664 | 89736   | 0,33 | 0,28 | 0,55 | 0,22 |
| rpoC1 | 160686 | 180465  | 1,12 | 0,93 |      |      |
| rpoC1 | 318694 | 243378  | 0,76 | 0,64 |      |      |
| rpoC1 | 245994 | 169100  | 0,69 | 0,57 |      |      |
| rpoC1 | 330058 | 225834  | 0,68 | 0,57 | 0,68 | 0,17 |
| rpoC2 | 150535 | 147487  | 0,98 | 0,81 |      |      |
| rpoC2 | 163128 | 143714  | 0,88 | 0,73 |      |      |
| rpoC2 | 192653 | 161850  | 0,84 | 0,70 |      |      |
| rpoC2 | 150898 | 100651  | 0,67 | 0,55 | 0,70 | 0,11 |
| rps11 | 94066  | 96326   | 1,02 | 0,85 |      |      |
| rps11 | 119138 | 98103   | 0,82 | 0,68 |      |      |
| rps11 | 99424  | 69514   | 0,70 | 0,58 |      |      |
| rps11 | 129912 | 79120   | 0,61 | 0,51 | 0,66 | 0,15 |
| rps14 | 288784 | 518574  | 1,80 | 1,49 |      |      |
| rps14 | 268734 | 475485  | 1,77 | 1,47 |      |      |
| rps14 | 320290 | 456520  | 1,43 | 1,19 |      |      |
| rps14 | 418022 | 534318  | 1,28 | 1,06 | 1,30 | 0,21 |
| rps15 | 28430  | 62186   | 2,19 | 1,82 |      |      |
| rps15 | 67476  | 108842  | 1,61 | 1,34 |      |      |
| rps15 | 70554  | 110378  | 1,56 | 1,30 |      |      |
| rps15 | 103973 | 86056   | 0,83 | 0,69 | 1,29 | 0,46 |
| rps16 | 179186 | 171568  | 0,96 | 0,80 |      |      |
| rps16 | 172592 | 133766  | 0,78 | 0,64 |      |      |
| rps16 | 190317 | 144250  | 0,76 | 0,63 |      |      |
| rps16 | 164246 | 86342   | 0,53 | 0,44 | 0,63 | 0,15 |
| rps18 | 87874  | 130564  | 1,49 | 1,24 |      |      |
| rps18 | 91370  | 128543  | 1,41 | 1,17 |      |      |
| rps18 | 131914 | 155113  | 1,18 | 0,98 |      |      |
| rps18 | 114790 | 66880   | 0,58 | 0,48 | 0,97 | 0,34 |
| rps19 | 161616 | 240301  | 1,49 | 1,24 |      |      |



|       |        |        |      |      |      |      |
|-------|--------|--------|------|------|------|------|
| rps19 | 140094 | 154305 | 1,10 | 0,92 |      |      |
| rps19 | 221132 | 230210 | 1,04 | 0,87 |      |      |
| rps19 | 114624 | 70596  | 0,62 | 0,51 | 0,88 | 0,30 |
| rps2  | 163732 | 211758 | 1,29 | 1,08 |      |      |
| rps2  | 162990 | 178288 | 1,09 | 0,91 |      |      |
| rps2  | 283592 | 255484 | 0,90 | 0,75 |      |      |
| rps2  | 191522 | 153426 | 0,80 | 0,67 | 0,85 | 0,18 |
| rps3  | 88554  | 166276 | 1,88 | 1,56 |      |      |
| rps3  | 121661 | 179173 | 1,47 | 1,23 |      |      |
| rps3  | 206686 | 204818 | 0,99 | 0,82 |      |      |
| rps3  | 177986 | 165901 | 0,93 | 0,78 | 1,10 | 0,37 |
| rps4  | 206738 | 176712 | 0,85 | 0,71 |      |      |
| rps4  | 176282 | 146445 | 0,83 | 0,69 |      |      |
| rps4  | 221932 | 172276 | 0,78 | 0,65 |      |      |
| rps4  | 282044 | 169120 | 0,60 | 0,50 | 0,64 | 0,10 |
| rps7  | 122998 | 137544 | 1,12 | 0,93 |      |      |
| rps7  | 214756 | 234216 | 1,09 | 0,91 |      |      |
| rps7  | 217220 | 181166 | 0,83 | 0,69 |      |      |
| rps7  | 277898 | 206430 | 0,74 | 0,62 | 0,79 | 0,16 |
| rps8  | 173196 | 245764 | 1,42 | 1,18 |      |      |
| rps8  | 95901  | 84518  | 0,88 | 0,73 |      |      |
| rps8  | 137762 | 117069 | 0,85 | 0,71 |      |      |
| rps8  | 152210 | 113315 | 0,74 | 0,62 | 0,81 | 0,25 |
| ycf1  | 148429 | 210214 | 1,42 | 1,18 |      |      |
| ycf1  | 176332 | 123898 | 0,70 | 0,58 |      |      |
| ycf1  | 177576 | 115922 | 0,65 | 0,54 |      |      |
| ycf1  | 190344 | 77759  | 0,41 | 0,34 | 0,66 | 0,36 |
| ycf15 | 110163 | 137048 | 1,24 | 1,03 |      |      |
| ycf15 | 150946 | 141601 | 0,94 | 0,78 |      |      |
| ycf15 | 161463 | 129446 | 0,80 | 0,67 |      |      |
| ycf15 | 112168 | 87494  | 0,78 | 0,65 | 0,78 | 0,18 |
| ycf2  | 58116  | 89198  | 1,53 | 1,28 |      |      |
| ycf2  | 96888  | 123572 | 1,28 | 1,06 |      |      |
| ycf2  | 137526 | 51580  | 0,38 | 0,31 |      |      |
| ycf2  | 118024 | 37743  | 0,32 | 0,27 | 0,73 | 0,52 |
| ycf3  | 135624 | 161692 | 1,19 | 0,99 |      |      |
| ycf3  | 130194 | 122162 | 0,94 | 0,78 |      |      |
| ycf3  | 123426 | 98538  | 0,80 | 0,66 |      |      |
| ycf3  | 215424 | 170842 | 0,79 | 0,66 | 0,77 | 0,16 |
| ycf4  | 184978 | 147682 | 0,80 | 0,66 |      |      |
| ycf4  | 194594 | 111114 | 0,57 | 0,47 |      |      |
| ycf4  | 185828 | 100216 | 0,54 | 0,45 |      |      |
| ycf4  | 227689 | 121029 | 0,53 | 0,44 | 0,51 | 0,11 |

## Experiment II

| GridSpotName | Cy3 (WT WS) | Cy5(sig4) | Cy5/Cy3 Ratio | Q-Standardized Expression Ratio | Average of Ratio | STDV |
|--------------|-------------|-----------|---------------|---------------------------------|------------------|------|
| 3'rps12      | 171838      | 254169    | 1,48          | 1,36                            |                  |      |
| 3'rps12      | 111744      | 137610    | 1,23          | 1,13                            |                  |      |
| 3'rps12      | 107333      | 119034    | 1,11          | 1,02                            |                  |      |
| 3'rps12      | 218858      | 134162    | 0,61          | 0,56                            | 1,02             | 0,34 |
| 5'rps12      | 138240      | 142672    | 1,03          | 0,95                            |                  |      |
| 5'rps12      | 99123       | 90709     | 0,92          | 0,84                            |                  |      |
| 5'rps12      | 191540      | 164896    | 0,86          | 0,79                            |                  |      |
| 5'rps12      | 182394      | 78569     | 0,43          | 0,40                            | 0,75             | 0,24 |
| accD         | 467467      | 659698    | 1,41          | 1,30                            |                  |      |
| accD         | 531953      | 593591    | 1,12          | 1,03                            |                  |      |
| accD         | 1088666     | 1066864   | 0,98          | 0,90                            |                  |      |
| accD         | 673711      | 624730    | 0,93          | 0,85                            | 1,02             | 0,20 |
| atpA         | 1301682     | 1712239   | 1,32          | 1,21                            |                  |      |
| atpA         | 1413940     | 1842434   | 1,30          | 1,20                            |                  |      |
| atpA         | 1635780     | 2001689   | 1,22          | 1,12                            |                  |      |
| atpA         | 1887364     | 1935501   | 1,03          | 0,94                            | 1,12             | 0,12 |
| atpB         | 937616      | 1778116   | 1,90          | 1,74                            |                  |      |
| atpB         | 939112      | 1392020   | 1,48          | 1,36                            |                  |      |
| atpB         | 1652279     | 2259071   | 1,37          | 1,26                            |                  |      |
| atpB         | 1678450     | 2068073   | 1,23          | 1,13                            | 1,37             | 0,26 |
| atpE         | 1565316     | 2570444   | 1,64          | 1,51                            |                  |      |
| atpE         | 1613671     | 2596848   | 1,61          | 1,48                            |                  |      |
| atpE         | 2107169     | 2794535   | 1,33          | 1,22                            |                  |      |
| atpE         | 2265105     | 2710091   | 1,20          | 1,10                            | 1,33             | 0,20 |
| atpF         | 2178171     | 3094538   | 1,42          | 1,31                            |                  |      |
| atpF         | 2308936     | 3186612   | 1,38          | 1,27                            |                  |      |
| atpF         | 2709477     | 2836194   | 1,05          | 0,96                            |                  |      |
| atpF         | 2459689     | 2513083   | 1,02          | 0,94                            | 1,12             | 0,20 |
| atpH         | 2930162     | 3365696   | 1,15          | 1,06                            |                  |      |
| atpH         | 3157539     | 3264300   | 1,03          | 0,95                            |                  |      |
| atpH         | 3115171     | 3086398   | 0,99          | 0,91                            |                  |      |
| atpH         | 3079052     | 2935119   | 0,95          | 0,88                            | 0,95             | 0,08 |
| atpI         | 934060      | 1228553   | 1,32          | 1,21                            |                  |      |
| atpI         | 1026833     | 1269940   | 1,24          | 1,14                            |                  |      |
| atpI         | 826899      | 953562    | 1,15          | 1,06                            |                  |      |
| atpI         | 676852      | 606286    | 0,90          | 0,82                            | 1,06             | 0,17 |
| ccsA(ycf5)   | 40962       | 74683     | 1,82          | 1,68                            |                  |      |
| ccsA(ycf5)   | 125822      | 154222    | 1,23          | 1,13                            |                  |      |
| ccsA(ycf5)   | 147324      | 174582    | 1,19          | 1,09                            |                  |      |
| ccsA(ycf5)   | 113774      | 99070     | 0,87          | 0,80                            | 1,18             | 0,37 |
| cemA (ycf10) | 210660      | 232722    | 1,10          | 1,02                            |                  |      |
| cemA (ycf10) | 285562      | 265248    | 0,93          | 0,85                            |                  |      |

|              |         |         |      |      |      |      |
|--------------|---------|---------|------|------|------|------|
| cemA (ycf10) | 318698  | 258684  | 0,81 | 0,75 |      |      |
| cemA (ycf10) | 462319  | 357616  | 0,77 | 0,71 | 0,83 | 0,14 |
| clpP         | 157510  | 201944  | 1,28 | 1,18 |      |      |
| clpP         | 117378  | 126660  | 1,08 | 0,99 |      |      |
| clpP         | 115253  | 99552   | 0,86 | 0,79 |      |      |
| clpP         | 138605  | 90418   | 0,65 | 0,60 | 0,89 | 0,25 |
| matK         | 1255904 | 2187833 | 1,74 | 1,60 |      |      |
| matK         | 1492940 | 2586400 | 1,73 | 1,59 |      |      |
| matK         | 1495582 | 2404113 | 1,61 | 1,48 |      |      |
| matK         | 1328126 | 2110072 | 1,59 | 1,46 | 1,53 | 0,07 |
| ndhA         | 73803   | 122462  | 1,66 | 1,53 |      |      |
| ndhA         | 137422  | 154738  | 1,13 | 1,04 |      |      |
| ndhA         | 199368  | 165330  | 0,83 | 0,76 |      |      |
| ndhA         | 197790  | 89546   | 0,45 | 0,42 | 0,94 | 0,47 |
| ndhB         | 1161426 | 1541736 | 1,33 | 1,22 |      |      |
| ndhB         | 923222  | 1223542 | 1,33 | 1,22 |      |      |
| ndhB         | 1016621 | 1127176 | 1,11 | 1,02 |      |      |
| ndhB         | 1321033 | 1366153 | 1,03 | 0,95 | 1,10 | 0,14 |
| ndhC         | 332234  | 473246  | 1,42 | 1,31 |      |      |
| ndhC         | 576156  | 765373  | 1,33 | 1,22 |      |      |
| ndhC         | 347924  | 361832  | 1,04 | 0,96 |      |      |
| ndhC         | 384184  | 385584  | 1,00 | 0,92 | 1,10 | 0,19 |
| ndhD         | 241053  | 330249  | 1,37 | 1,26 |      |      |
| ndhD         | 241651  | 208654  | 0,86 | 0,79 |      |      |
| ndhD         | 155172  | 122040  | 0,79 | 0,72 |      |      |
| ndhD         | 570448  | 445928  | 0,78 | 0,72 | 0,87 | 0,26 |
| ndhE         | 349464  | 495534  | 1,42 | 1,30 |      |      |
| ndhE         | 893131  | 1141596 | 1,28 | 1,18 |      |      |
| ndhE         | 1028384 | 1178727 | 1,15 | 1,05 |      |      |
| ndhE         | 637626  | 669276  | 1,05 | 0,96 | 1,12 | 0,15 |
| ndhF         | 151964  | 81787   | 0,54 | 0,49 |      |      |
| ndhF         | 146902  | 67784   | 0,46 | 0,42 |      |      |
| ndhF         | 239071  | 92915   | 0,39 | 0,36 |      |      |
| ndhF         | 364916  | 127533  | 0,35 | 0,32 | 0,40 | 0,07 |
| ndhG         | 957105  | 717104  | 0,75 | 0,69 |      |      |
| ndhG         | 853086  | 577770  | 0,68 | 0,62 |      |      |
| ndhG         | 1066852 | 701365  | 0,66 | 0,60 |      |      |
| ndhG         | 1335964 | 785296  | 0,59 | 0,54 | 0,61 | 0,06 |
| ndhH         | 109904  | 131934  | 1,20 | 1,10 |      |      |
| ndhH         | 137160  | 159608  | 1,16 | 1,07 |      |      |
| ndhH         | 113993  | 108314  | 0,95 | 0,87 |      |      |
| ndhH         | 138288  | 110872  | 0,80 | 0,74 | 0,95 | 0,17 |
| ndhI         | 107324  | 147027  | 1,37 | 1,26 |      |      |
| ndhI         | 158152  | 150866  | 0,95 | 0,88 |      |      |
| ndhI         | 130198  | 92832   | 0,71 | 0,66 |      |      |
| ndhI         | 174830  | 90144   | 0,52 | 0,47 | 0,82 | 0,34 |
| ndhJ         | 838506  | 1245264 | 1,49 | 1,37 |      |      |

|             |         |         |      |      |      |      |
|-------------|---------|---------|------|------|------|------|
| ndhJ        | 701436  | 1020808 | 1,46 | 1,34 |      |      |
| ndhJ        | 640296  | 844182  | 1,32 | 1,21 |      |      |
| ndhJ        | 964200  | 1194056 | 1,24 | 1,14 | 1,27 | 0,11 |
| ndhK        | 743153  | 1090658 | 1,47 | 1,35 |      |      |
| ndhK        | 586094  | 731418  | 1,25 | 1,15 |      |      |
| ndhK        | 571013  | 652248  | 1,14 | 1,05 |      |      |
| ndhK        | 868051  | 849398  | 0,98 | 0,90 | 1,11 | 0,19 |
| petA        | 114270  | 166895  | 1,46 | 1,34 |      |      |
| petA        | 190197  | 125562  | 0,66 | 0,61 |      |      |
| petA        | 980494  | 591766  | 0,60 | 0,55 |      |      |
| petA        | 220017  | 119688  | 0,54 | 0,50 | 0,75 | 0,40 |
| petB        | 596689  | 852218  | 1,43 | 1,31 |      |      |
| petB        | 706252  | 905229  | 1,28 | 1,18 |      |      |
| petB        | 852112  | 1061698 | 1,25 | 1,15 |      |      |
| petB        | 737862  | 908193  | 1,23 | 1,13 | 1,19 | 0,08 |
| petD        | 104616  | 158234  | 1,51 | 1,39 |      |      |
| petD        | 107630  | 146154  | 1,36 | 1,25 |      |      |
| petD        | 142002  | 133888  | 0,94 | 0,87 |      |      |
| petD        | 228710  | 186088  | 0,81 | 0,75 | 1,07 | 0,30 |
| petG        | 276036  | 609651  | 2,21 | 2,03 |      |      |
| petG        | 223520  | 390766  | 1,75 | 1,61 |      |      |
| petG        | 220152  | 293248  | 1,33 | 1,22 |      |      |
| petG        | 449498  | 591105  | 1,32 | 1,21 | 1,52 | 0,39 |
| petL (ycf7) | 158676  | 256049  | 1,61 | 1,48 |      |      |
| petL (ycf7) | 125399  | 186648  | 1,49 | 1,37 |      |      |
| petL (ycf7) | 170607  | 219622  | 1,29 | 1,18 |      |      |
| petL (ycf7) | 266608  | 155678  | 0,58 | 0,54 | 1,14 | 0,42 |
| petN (ycf6) | 284506  | 746358  | 2,62 | 2,41 |      |      |
| petN (ycf6) | 204590  | 364044  | 1,78 | 1,64 |      |      |
| petN (ycf6) | 406251  | 610900  | 1,50 | 1,38 |      |      |
| petN (ycf6) | 375402  | 530820  | 1,41 | 1,30 | 1,68 | 0,51 |
| psaA        | 1102784 | 1381296 | 1,25 | 1,15 |      |      |
| psaA        | 1169776 | 1341890 | 1,15 | 1,05 |      |      |
| psaA        | 1273181 | 1453970 | 1,14 | 1,05 |      |      |
| psaA        | 1047520 | 987261  | 0,94 | 0,87 | 1,03 | 0,12 |
| psaB        | 3234273 | 3601727 | 1,11 | 1,02 |      |      |
| psaB        | 3055441 | 3353435 | 1,10 | 1,01 |      |      |
| psaB        | 3244455 | 3431769 | 1,06 | 0,97 |      |      |
| psaB        | 3237189 | 3282162 | 1,01 | 0,93 | 0,98 | 0,04 |
| psaC        | 567311  | 969056  | 1,71 | 1,57 |      |      |
| psaC        | 1010980 | 1596096 | 1,58 | 1,45 |      |      |
| psaC        | 485820  | 673680  | 1,39 | 1,27 |      |      |
| psaC        | 609220  | 684009  | 1,12 | 1,03 | 1,33 | 0,23 |
| psal        | 49416   | 143586  | 2,91 | 2,67 |      |      |
| psal        | 140224  | 173401  | 1,24 | 1,14 |      |      |
| psal        | 75932   | 85014   | 1,12 | 1,03 |      |      |
| psal        | 129678  | 84188   | 0,65 | 0,60 | 1,36 | 0,90 |

|      |         |         |      |      |      |      |
|------|---------|---------|------|------|------|------|
| psaJ | 892819  | 2141282 | 2,40 | 2,20 |      |      |
| psaJ | 1118082 | 2196784 | 1,96 | 1,81 |      |      |
| psaJ | 717958  | 1230736 | 1,71 | 1,58 |      |      |
| psaJ | 759642  | 1132964 | 1,49 | 1,37 | 1,74 | 0,36 |
| psbA | 3375470 | 3571852 | 1,06 | 0,97 |      |      |
| psbA | 2294313 | 1876545 | 0,82 | 0,75 |      |      |
| psbA | 3228920 | 2558678 | 0,79 | 0,73 |      |      |
| psbA | 3079645 | 2416046 | 0,78 | 0,72 | 0,79 | 0,12 |
| psbB | 831337  | 955032  | 1,15 | 1,06 |      |      |
| psbB | 997304  | 1023758 | 1,03 | 0,94 |      |      |
| psbB | 1136578 | 1040739 | 0,92 | 0,84 |      |      |
| psbB | 1198780 | 1086906 | 0,91 | 0,83 | 0,92 | 0,11 |
| psbC | 285379  | 492172  | 1,72 | 1,59 |      |      |
| psbC | 244376  | 347307  | 1,42 | 1,31 |      |      |
| psbC | 398722  | 418405  | 1,05 | 0,96 |      |      |
| psbC | 228718  | 239996  | 1,05 | 0,96 | 1,21 | 0,31 |
| psbD | 1339941 | 1465344 | 1,09 | 1,01 |      |      |
| psbD | 1405420 | 1514438 | 1,08 | 0,99 |      |      |
| psbD | 1342710 | 1345669 | 1,00 | 0,92 |      |      |
| psbD | 1850885 | 1742136 | 0,94 | 0,87 | 0,95 | 0,06 |
| psbE | 2458752 | 3296735 | 1,34 | 1,23 |      |      |
| psbE | 2497078 | 3206506 | 1,28 | 1,18 |      |      |
| psbE | 3014596 | 3309258 | 1,10 | 1,01 |      |      |
| psbE | 2914508 | 3167492 | 1,09 | 1,00 | 1,11 | 0,12 |
| psbF | 2817216 | 3233017 | 1,15 | 1,05 |      |      |
| psbF | 3027013 | 3470197 | 1,15 | 1,05 |      |      |
| psbF | 2977810 | 3294392 | 1,11 | 1,02 |      |      |
| psbF | 3303313 | 3114555 | 0,94 | 0,87 | 1,00 | 0,09 |
| psbH | 107190  | 229082  | 2,14 | 1,96 |      |      |
| psbH | 247499  | 295566  | 1,19 | 1,10 |      |      |
| psbH | 158211  | 152475  | 0,96 | 0,89 |      |      |
| psbH | 242297  | 210841  | 0,87 | 0,80 | 1,19 | 0,53 |
| psbl | 398256  | 412999  | 1,04 | 0,95 |      |      |
| psbl | 318642  | 304704  | 0,96 | 0,88 |      |      |
| psbl | 370163  | 338962  | 0,92 | 0,84 |      |      |
| psbl | 327732  | 221614  | 0,68 | 0,62 | 0,82 | 0,14 |
| psbJ | 246784  | 339255  | 1,37 | 1,26 |      |      |
| psbJ | 257416  | 280192  | 1,09 | 1,00 |      |      |
| psbJ | 374360  | 373044  | 1,00 | 0,92 |      |      |
| psbJ | 327303  | 231496  | 0,71 | 0,65 | 0,96 | 0,25 |
| psbK | 376634  | 860637  | 2,29 | 2,10 |      |      |
| psbK | 553358  | 987420  | 1,78 | 1,64 |      |      |
| psbK | 698970  | 953943  | 1,36 | 1,25 |      |      |
| psbK | 646819  | 732255  | 1,13 | 1,04 | 1,51 | 0,47 |
| psbL | 172413  | 330267  | 1,92 | 1,76 |      |      |
| psbL | 189981  | 310200  | 1,63 | 1,50 |      |      |
| psbL | 105078  | 156174  | 1,49 | 1,37 |      |      |

|             |         |         |      |      |      |      |
|-------------|---------|---------|------|------|------|------|
| psbL        | 173507  | 117869  | 0,68 | 0,62 | 1,31 | 0,49 |
| psbM        | 317276  | 419313  | 1,32 | 1,21 |      |      |
| psbM        | 647700  | 787036  | 1,22 | 1,12 |      |      |
| psbM        | 583105  | 552294  | 0,95 | 0,87 |      |      |
| psbM        | 414438  | 245406  | 0,59 | 0,54 | 0,94 | 0,30 |
| psbN        | 2396300 | 3113805 | 1,30 | 1,19 |      |      |
| psbN        | 2536701 | 3249555 | 1,28 | 1,18 |      |      |
| psbN        | 2558333 | 3172401 | 1,24 | 1,14 |      |      |
| psbN        | 2058249 | 2484441 | 1,21 | 1,11 | 1,16 | 0,04 |
| psbT (ycf8) | 2341255 | 2706442 | 1,16 | 1,06 |      |      |
| psbT (ycf8) | 2624743 | 2736304 | 1,04 | 0,96 |      |      |
| psbT (ycf8) | 2911351 | 2850710 | 0,98 | 0,90 |      |      |
| psbT (ycf8) | 2912368 | 2827878 | 0,97 | 0,89 | 0,95 | 0,08 |
| psbZ (ycf9) | 209008  | 422354  | 2,02 | 1,86 |      |      |
| psbZ (ycf9) | 177562  | 304598  | 1,72 | 1,58 |      |      |
| psbZ (ycf9) | 193916  | 311892  | 1,61 | 1,48 |      |      |
| psbZ (ycf9) | 221480  | 137821  | 0,62 | 0,57 | 1,37 | 0,56 |
| rbcL        | 439206  | 603344  | 1,37 | 1,26 |      |      |
| rbcL        | 800012  | 987644  | 1,23 | 1,13 |      |      |
| rbcL        | 843787  | 834438  | 0,99 | 0,91 |      |      |
| rbcL        | 644424  | 533013  | 0,83 | 0,76 | 1,02 | 0,22 |
| rpl14       | 256386  | 428838  | 1,67 | 1,54 |      |      |
| rpl14       | 250248  | 373076  | 1,49 | 1,37 |      |      |
| rpl14       | 378462  | 507824  | 1,34 | 1,23 |      |      |
| rpl14       | 274733  | 257225  | 0,94 | 0,86 | 1,25 | 0,29 |
| rpl16       | 69961   | 201904  | 2,89 | 2,65 |      |      |
| rpl16       | 163292  | 156996  | 0,96 | 0,88 |      |      |
| rpl16       | 134232  | 118358  | 0,88 | 0,81 |      |      |
| rpl16       | 245044  | 211276  | 0,86 | 0,79 | 1,28 | 0,91 |
| rpl2        | 179746  | 245221  | 1,36 | 1,25 |      |      |
| rpl2        | 322978  | 385917  | 1,19 | 1,10 |      |      |
| rpl2        | 168782  | 196866  | 1,17 | 1,07 |      |      |
| rpl2        | 318300  | 348932  | 1,10 | 1,01 | 1,11 | 0,10 |
| rpl20       | 144973  | 333755  | 2,30 | 2,12 |      |      |
| rpl20       | 206470  | 249472  | 1,21 | 1,11 |      |      |
| rpl20       | 255229  | 295116  | 1,16 | 1,06 |      |      |
| rpl20       | 310926  | 295252  | 0,95 | 0,87 | 1,29 | 0,56 |
| rpl22       | 179931  | 308478  | 1,71 | 1,58 |      |      |
| rpl22       | 233768  | 319452  | 1,37 | 1,26 |      |      |
| rpl22       | 372656  | 434839  | 1,17 | 1,07 |      |      |
| rpl22       | 169927  | 195650  | 1,15 | 1,06 | 1,24 | 0,24 |
| rpl23       | 135632  | 266794  | 1,97 | 1,81 |      |      |
| rpl23       | 242078  | 292710  | 1,21 | 1,11 |      |      |
| rpl23       | 150743  | 179268  | 1,19 | 1,09 |      |      |
| rpl23       | 150028  | 156810  | 1,05 | 0,96 | 1,24 | 0,38 |
| rpl32       | 354738  | 701816  | 1,98 | 1,82 |      |      |
| rpl32       | 204307  | 379753  | 1,86 | 1,71 |      |      |

|       |         |         |      |      |      |      |
|-------|---------|---------|------|------|------|------|
| rpl32 | 251287  | 422762  | 1,68 | 1,55 |      |      |
| rpl32 | 143185  | 232746  | 1,63 | 1,49 | 1,64 | 0,15 |
| rpl33 | 172592  | 355873  | 2,06 | 1,90 |      |      |
| rpl33 | 222188  | 368214  | 1,66 | 1,52 |      |      |
| rpl33 | 240104  | 294690  | 1,23 | 1,13 |      |      |
| rpl33 | 273440  | 260501  | 0,95 | 0,88 | 1,36 | 0,45 |
| rpl36 | 708862  | 1186276 | 1,67 | 1,54 |      |      |
| rpl36 | 396674  | 613952  | 1,55 | 1,42 |      |      |
| rpl36 | 635728  | 759042  | 1,19 | 1,10 |      |      |
| rpl36 | 637862  | 570929  | 0,90 | 0,82 | 1,22 | 0,32 |
| rpoA  | 348509  | 415113  | 1,19 | 1,09 |      |      |
| rpoA  | 427015  | 452490  | 1,06 | 0,97 |      |      |
| rpoA  | 243565  | 252477  | 1,04 | 0,95 |      |      |
| rpoA  | 324046  | 303152  | 0,94 | 0,86 | 0,97 | 0,09 |
| rpoB  | 145692  | 241141  | 1,66 | 1,52 |      |      |
| rpoB  | 229112  | 249789  | 1,09 | 1,00 |      |      |
| rpoB  | 307995  | 221754  | 0,72 | 0,66 |      |      |
| rpoB  | 253790  | 172623  | 0,68 | 0,63 | 0,95 | 0,41 |
| rpoC1 | 446310  | 781811  | 1,75 | 1,61 |      |      |
| rpoC1 | 309630  | 529346  | 1,71 | 1,57 |      |      |
| rpoC1 | 423433  | 443997  | 1,05 | 0,96 |      |      |
| rpoC1 | 417723  | 385074  | 0,92 | 0,85 | 1,25 | 0,40 |
| rpoC2 | 134249  | 212517  | 1,58 | 1,46 |      |      |
| rpoC2 | 110868  | 157232  | 1,42 | 1,30 |      |      |
| rpoC2 | 111148  | 128346  | 1,15 | 1,06 |      |      |
| rpoC2 | 164604  | 85124   | 0,52 | 0,48 | 1,08 | 0,43 |
| rps11 | 33952   | 115400  | 3,40 | 3,12 |      |      |
| rps11 | 82566   | 103281  | 1,25 | 1,15 |      |      |
| rps11 | 133293  | 84116   | 0,63 | 0,58 |      |      |
| rps11 | 143670  | 70236   | 0,49 | 0,45 | 1,33 | 1,23 |
| rps14 | 2456409 | 3160017 | 1,29 | 1,18 |      |      |
| rps14 | 2919533 | 3353310 | 1,15 | 1,06 |      |      |
| rps14 | 2656911 | 2923514 | 1,10 | 1,01 |      |      |
| rps14 | 3016452 | 3135876 | 1,04 | 0,96 | 1,05 | 0,09 |
| rps15 | 85332   | 120580  | 1,41 | 1,30 |      |      |
| rps15 | 76409   | 78597   | 1,03 | 0,95 |      |      |
| rps15 | 102944  | 83588   | 0,81 | 0,75 |      |      |
| rps15 | 142199  | 76214   | 0,54 | 0,49 | 0,87 | 0,34 |
| rps16 | 120124  | 130274  | 1,08 | 1,00 |      |      |
| rps16 | 140818  | 120168  | 0,85 | 0,78 |      |      |
| rps16 | 144690  | 100060  | 0,69 | 0,64 |      |      |
| rps16 | 238508  | 127343  | 0,53 | 0,49 | 0,73 | 0,22 |
| rps18 | 162864  | 342806  | 2,10 | 1,93 |      |      |
| rps18 | 171281  | 352539  | 2,06 | 1,89 |      |      |
| rps18 | 204118  | 379435  | 1,86 | 1,71 |      |      |
| rps18 | 128504  | 95988   | 0,75 | 0,69 | 1,56 | 0,58 |
| rps19 | 138016  | 168717  | 1,22 | 1,12 |      |      |

|       |        |        |      |      |      |      |
|-------|--------|--------|------|------|------|------|
| rps19 | 157732 | 187254 | 1,19 | 1,09 |      |      |
| rps19 | 309466 | 315186 | 1,02 | 0,94 |      |      |
| rps19 | 186626 | 180814 | 0,97 | 0,89 | 1,01 | 0,11 |
| rps2  | 158730 | 375342 | 2,36 | 2,17 |      |      |
| rps2  | 230720 | 447140 | 1,94 | 1,78 |      |      |
| rps2  | 187656 | 294764 | 1,57 | 1,44 |      |      |
| rps2  | 207758 | 204203 | 0,98 | 0,90 | 1,57 | 0,54 |
| rps3  | 223489 | 439363 | 1,97 | 1,81 |      |      |
| rps3  | 315054 | 454773 | 1,44 | 1,33 |      |      |
| rps3  | 282152 | 374109 | 1,33 | 1,22 |      |      |
| rps3  | 503360 | 624888 | 1,24 | 1,14 | 1,38 | 0,30 |
| rps4  | 182156 | 335708 | 1,84 | 1,69 |      |      |
| rps4  | 197412 | 344484 | 1,75 | 1,60 |      |      |
| rps4  | 226530 | 382329 | 1,69 | 1,55 |      |      |
| rps4  | 211732 | 244688 | 1,16 | 1,06 | 1,48 | 0,28 |
| rps7  | 408002 | 611306 | 1,50 | 1,38 |      |      |
| rps7  | 467414 | 649561 | 1,39 | 1,28 |      |      |
| rps7  | 396082 | 472836 | 1,19 | 1,10 |      |      |
| rps7  | 334258 | 306806 | 0,92 | 0,84 | 1,15 | 0,24 |
| rps8  | 303744 | 336031 | 1,11 | 1,02 |      |      |
| rps8  | 416164 | 368876 | 0,89 | 0,81 |      |      |
| rps8  | 472284 | 360424 | 0,76 | 0,70 |      |      |
| rps8  | 289902 | 217858 | 0,75 | 0,69 | 0,81 | 0,15 |
| ycf1  | 102840 | 188517 | 1,83 | 1,69 |      |      |
| ycf1  | 93428  | 70758  | 0,76 | 0,70 |      |      |
| ycf1  | 144268 | 77018  | 0,53 | 0,49 |      |      |
| ycf1  | 229062 | 66914  | 0,29 | 0,27 | 0,79 | 0,63 |
| ycf15 | 91993  | 178709 | 1,94 | 1,79 |      |      |
| ycf15 | 198386 | 262728 | 1,32 | 1,22 |      |      |
| ycf15 | 191807 | 226564 | 1,18 | 1,09 |      |      |
| ycf15 | 157780 | 168430 | 1,07 | 0,98 | 1,27 | 0,36 |
| ycf2  | 57476  | 79611  | 1,39 | 1,27 |      |      |
| ycf2  | 88362  | 103750 | 1,17 | 1,08 |      |      |
| ycf2  | 125926 | 140508 | 1,12 | 1,03 |      |      |
| ycf2  | 142754 | 94542  | 0,66 | 0,61 | 1,00 | 0,28 |
| ycf3  | 242878 | 338156 | 1,39 | 1,28 |      |      |
| ycf3  | 132564 | 176760 | 1,33 | 1,23 |      |      |
| ycf3  | 193937 | 245543 | 1,27 | 1,16 |      |      |
| ycf3  | 197450 | 246408 | 1,25 | 1,15 | 1,21 | 0,06 |
| ycf4  | 248024 | 202421 | 0,82 | 0,75 |      |      |
| ycf4  | 274810 | 222448 | 0,81 | 0,74 |      |      |
| ycf4  | 232270 | 164389 | 0,71 | 0,65 |      |      |
| ycf4  | 227488 | 100500 | 0,44 | 0,41 | 0,64 | 0,16 |
